# Supplementary figures and images for: Increased Alu RNA processing in Alzheimer brains is linked to gene expression changes
Source: PubMed Central journal article supplement — EMBO Rep. 2021 Mar 1;22(5):e52255. doi: 10.15252/embr.202052255 (PMC8097388; doi:10.15252/embr.202052255), 2021-03-01

**Gels for Fig. 8C**

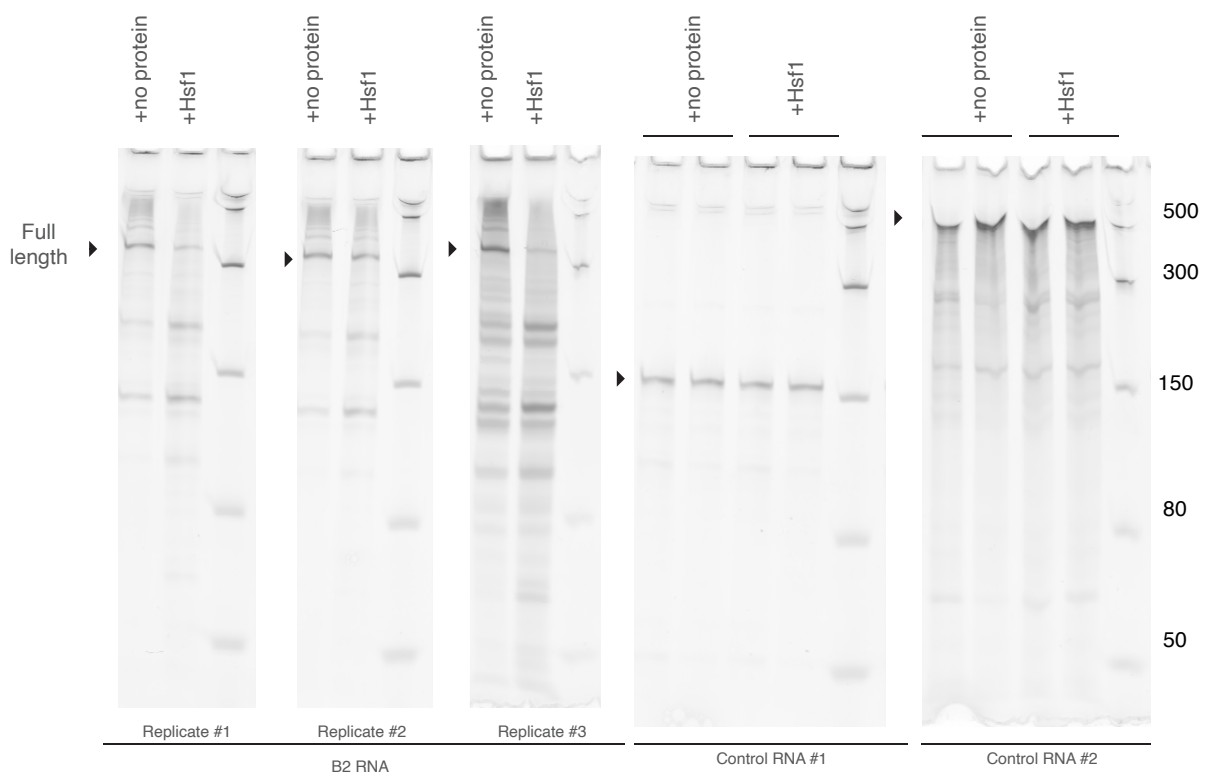

**Gels for Fig. 8B**

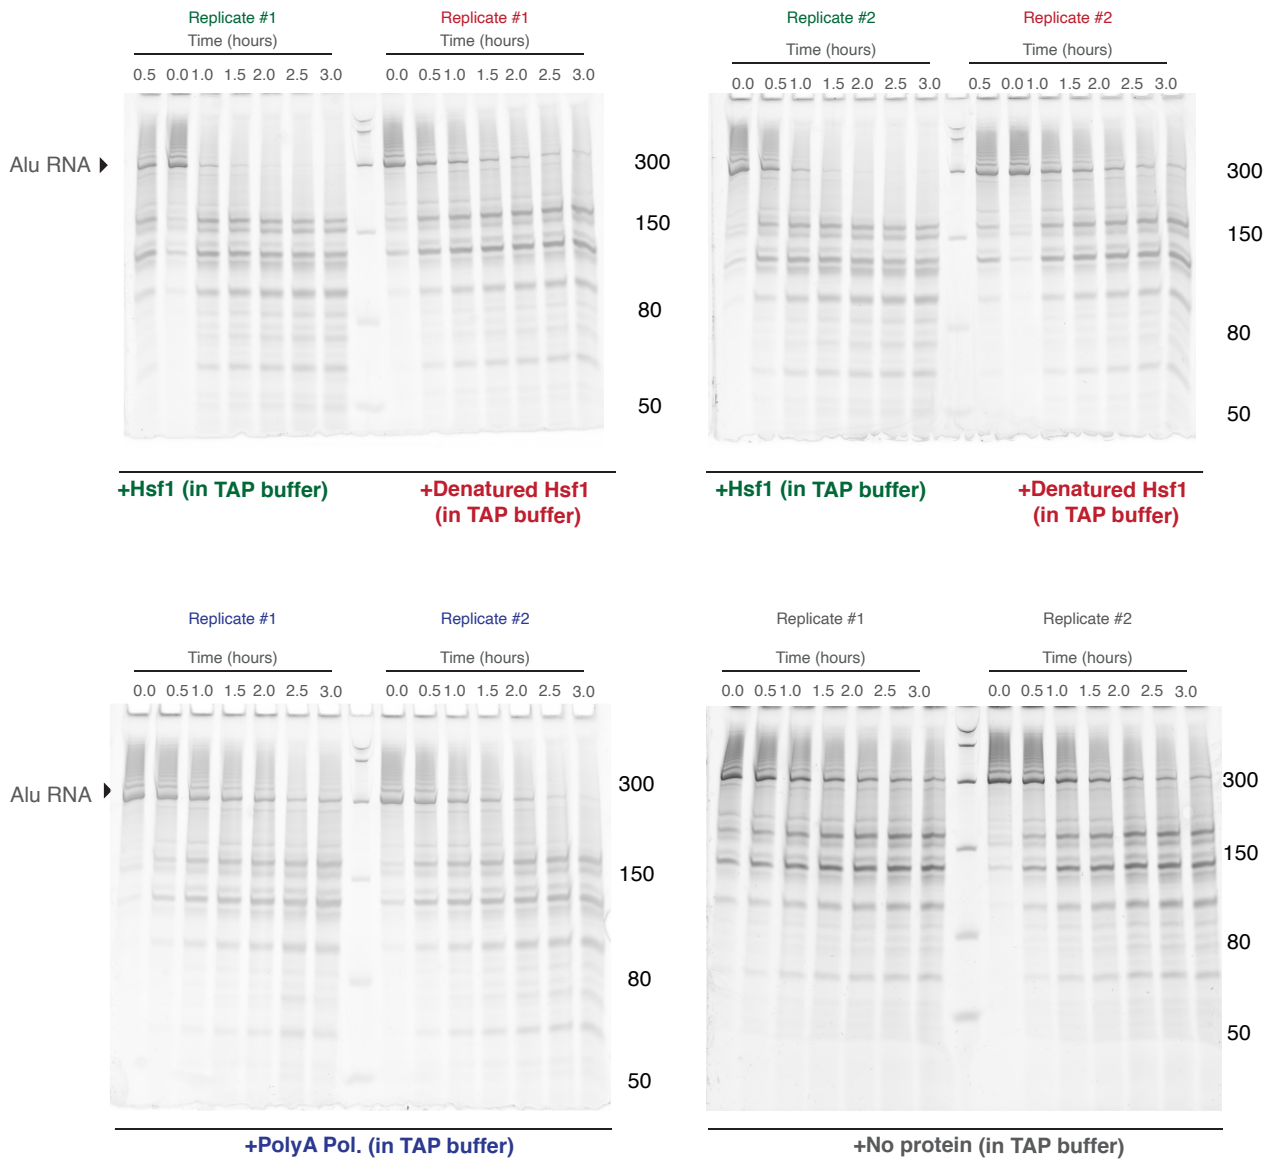

Supplement: EMBR-22-e52255-s003.pdf [file EMBR-22-e52255-s003.pdf]
